# Supplementary material
Source: MDPI journal article supplement (https://www.mdpi.com/2071-1050/14/15/9496)
Supplement: s1 [file s1]

Archive with 2 entries (2 files):
- sustainability-1772010-supplementary/Supplementary S1.pdf
- sustainability-1772010-supplementary/Supplementary S2.pdf
