# Supplementary material
Source: MDPI journal article supplement (https://www.mdpi.com/2071-1050/14/15/9496)
Supplement: s1 [file s1]

*Supplementary S1. Questionnaires used for data collection on life quality and local water quality during and before the COVID-19 pandemic.*

In

Gunko, R.; Rapeli, L.; Karell, P. Striving with global stress on a local level. Has the COVID-19 pandemic changed the relationship between people and nature? *Sustainability* **2022**.

The following questions were asked in the questionnaire. Only completely filled questionnaires were used in the analyses.

### 1. Questionnaire 2021 during COVID-19

1. What year were you born?
2. Are you a) female b) male c) prefer not to say
3. What is the highest level of education you have completed? a) primary education; b) high school; c) vocational school d) polytechnic university e) university f) other
4. Which of the following comes closest to how you feel about your household's income nowadays? a) living comfortably on present income b) coping on present income c) difficult on present income d) very difficult on present income
5. How is your health in general? Would you say it is...a) very good b) good c) fair d) bad e) very bad
6. Place the pointer on the map approximately where your home or cottage is. This gives us an idea of which area in Raseborg you are thinking about when answering our questions. You can place the pointer by clicking on the right place on the map. You can zoom using the plus and minus symbols.

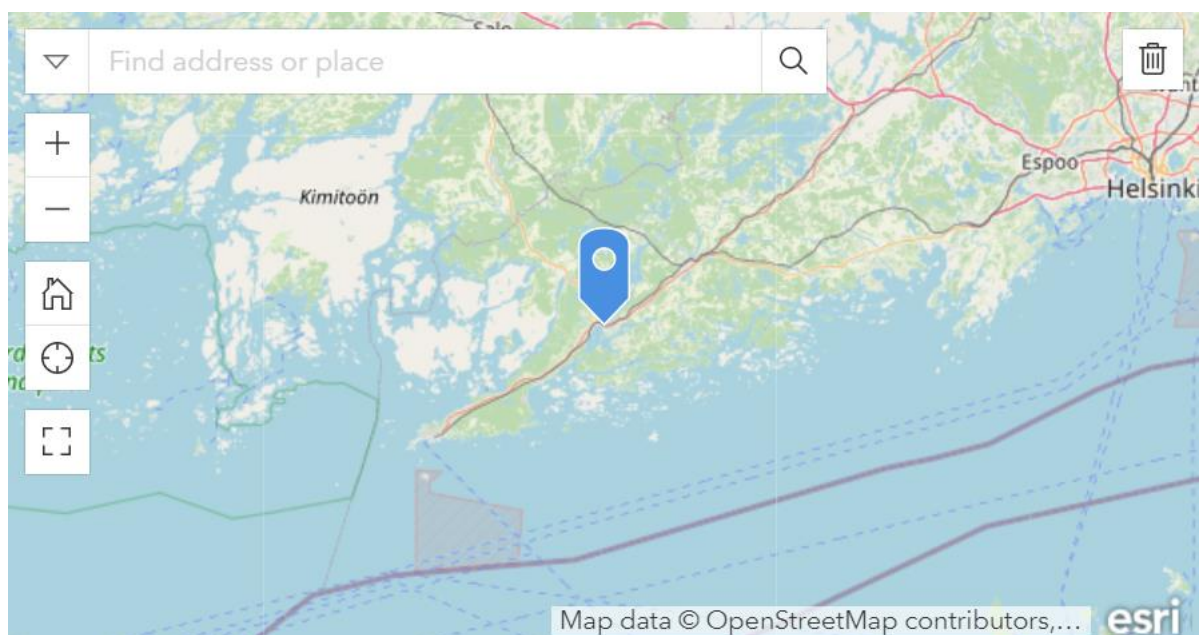

**Figure S1.** The example of the map proposed to use for the respondents.

In the next two questions please think about the environment, which is close to your home in Raseborg. If you do not have a permanent home in Raseborg, but a summer cottage, please think about the environment close to your cottage.

7. How would you assess the state of the natural environment in your property and in its immediate surroundings? Please choose a number from 0 to 10, where 0 means it is very bad and 10 means it is excellent.

8. How would you assess the quality of the water on your property and in its immediate surroundings? Please choose a number from 0 to 10, where 0 means it is very bad and 10 means it is excellent. If your home or cottage far away from any water body, give your estimation in the nearest water body to your house.

9. Some of the benefits one can receive from nature include, for example, spending time in the forest, hiking, swimming, sailing or picking berries. In your assessment, how important are such things for you? Please choose a number from 0 to 10, where 0 means they are not at all important and 10 means they are very important.

10. In your assessment, how important is the state of the environment around your property for your overall wellbeing? Please choose a number from 0 to 10, where 0 means it does not matter at all and 10 means it is extremely important.

11. All things considered, how satisfied would you say you are with your life these days? Please tell me on a scale from 0 to 10, where 0 means very dissatisfied and 10 means very satisfied.

The next questions are related to your experiences during COVID-19 pandemic

12. How much you have been personally affected by the COVID-19 pandemic on a scale from 0 to 10, where 0 means you have not been affected and 10 means you have been affected dramatically (for example, you or someone close to you has been seriously ill, your daily routines have changed completely, or your personal economy has suffered significantly)

13. Again thinking about the surroundings of your house or cottage, do you think that the state of the environment has changed because of the pandemic? There has been a) significant positive change, b) small positive change, c) no change, d) small negative change, or e) significant negative change.

14. In a similar way, would you say that water quality has changed during the pandemic? Would you say there has been a) significant positive change, b) small positive change, c) no change, d) small negative change, or e) significant negative change.

15. For each statement, please say if you feel like your personal life has been affected by the pandemic a) completely agree, b) somehow agree, c) somewhat disagree, d) completely disagree, e) cannot say

15.1 I have spent more time in nature than before (e.g. walking, skiing, fishing).

15.2 I now feel more concerned about nature than before the pandemic.

15.3 I have started to buy more nature-friendly products than usual because of the pandemic.

15.4 I pay more attention to environment-friendly behavior, such as buying less products packed in plastic or using my car less.

16. What do you think about the following statement about the impact of the media on your environmental behavior? a) completely agree, b) somehow agree, c) somewhat disagree, d) completely disagree, e) cannot say

Media does not affect my decisions to be more environmentally friendly.

17. Do you think the relationship between people and the nature has been affected by the pandemic? To answer, you may, for example, think about your own experiences of talking with your relatives, friends, or neighbors.

a) People have started to care much more about the nature b) People have started to care a little more about the nature, c) People care as much about nature as they did before, d) People have started to care a bit less about the nature e) People have started to care much less about the nature f) Cannot say

18. To what extent would you say that the pandemic has been caused by the impact people have on the nature? Provide your answer on a scale from 0 to 10 where 0 means the pandemic has nothing to do with how people treat the nature and where 10 means that the pandemic is caused entirely by human impact on nature.

## **2. Questionnaire 2018-19 before COVID-19**

Address:

1. What year were you born?

2. Are you a) female b) male c) prefer not to say

3. What is the highest level of education you have completed? a) primary education; b) high school; c) vocational school d) polytechnic university e) university f) other

4. Which of the following comes closest to how you feel about your household's income nowadays? a) living comfortably on present income b) coping on present income c) difficult on present income d) very difficult on present income

5. How is your health in general? Would you say it is...a) very good b) good c) fair d) bad e) very bad

6. Do you own or rent the property? a) I own it myself or with other people b) I'm renting it c) other

7. Which of the following best describes your relationship with the property? a) permanent home, b) summer cottage or vacation home, c) other (specify)

8. How many years have you lived in this home or summer cottage? a) max 2 years; b) 2 – 5 years; c) 5 – 15 years; d) more than 15 years

9. How emotionally attached do you feel to your property? Please choose a number from 0 to 10, where 0 means not at all emotionally attached and 10 means very emotionally attached.

10. How would you assess the state of the natural environment in your property and in its immediate surroundings? Please choose a number from 0 to 10, where 0 means it is very bad and 10 means it is excellent.

11. How would you assess the quality of the water on your property and in its immediate surroundings? Please choose a number from 0 to 10, where 0 means it is very bad and 10 means it is excellent.

12. In your assessment, what would you say has the biggest impact on the water quality on and around your property? a) industry, b) forestry, c) agriculture, d) other (specify)

13. Some of the benefits one can receive from nature include, for example, spending time in the forest, hiking, swimming, sailing or picking berries. In your assessment, how important are such things for you? Please choose a number from 0 to 10, where 0 means they are not at all important and 10 means they are very important.

14. In your assessment, how important is the state of the environment around your property for your overall wellbeing? Please choose a number from 0 to 10, where 0 means it does not matter at all and 10 means it is extremely important.

15. All things considered, how satisfied would you say you are with your life these days? Please tell me on a scale from 0 to 10, where 0 means very dissatisfied and 10 means very satisfied.

16. Taking all things together, on a scale of 0 to 10, how happy would you say you are? Here 0 means you are very unhappy and 10 means you are very happy.
