# Supplementary material
Source: MDPI journal article supplement (https://www.mdpi.com/2071-1050/14/15/9496)
Supplement: s1 [file s1 › sustainability-1772010-supplementary/Supplementary S2.pdf]

Supplementary S2. Variation in subjective water quality (sWQ) responses.

In

Gunko, R.; Rapeli, L.; Karell, P. Striving with global stress on a local level. Has the COVID-19 pandemic changed the relationship between people and nature? *Sustainability* **2022**.

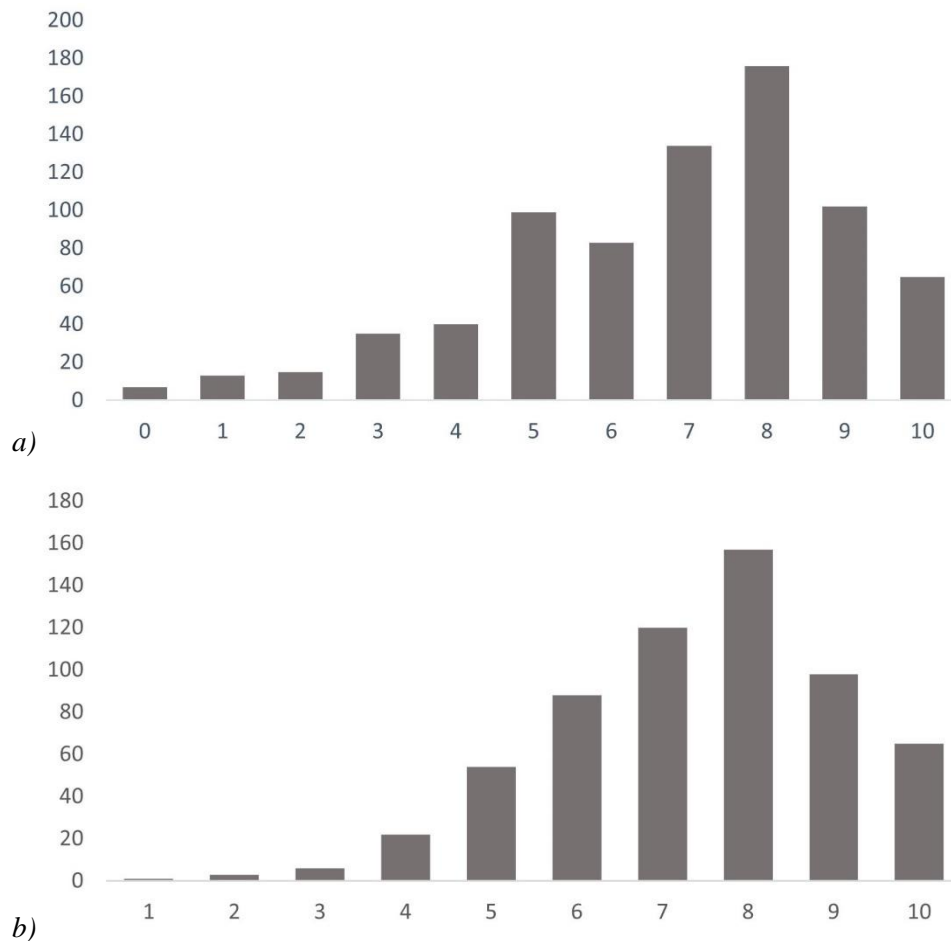

**Figure S2.** Histograms depicting the variation in responses about local subjective coastal water quality (sWQ): a) 2018-19; b) 2021. Values on the x-axis (0-10) refer to 0 = extremely poor water quality and 10 = extremely good water quality, the y-axis is the number of observations. Each sWQ assessment data point refers to a single locality in the study area. For a complete view of the study area and the data collection points see Figure 1 in the main article.
